# Supplementary material for: Prognostic significance of epigenetic regulatory gene expression in patients with non-small-cell lung cancer
Source: publisher site journal article supplement (doi:10.18632/aging.202600), 2021-02-26
Supplement: Supplementary file [file aging-v13i5-202600-supplementary-material-SD1.pdf]

## SUPPLEMENTARY FIGURE

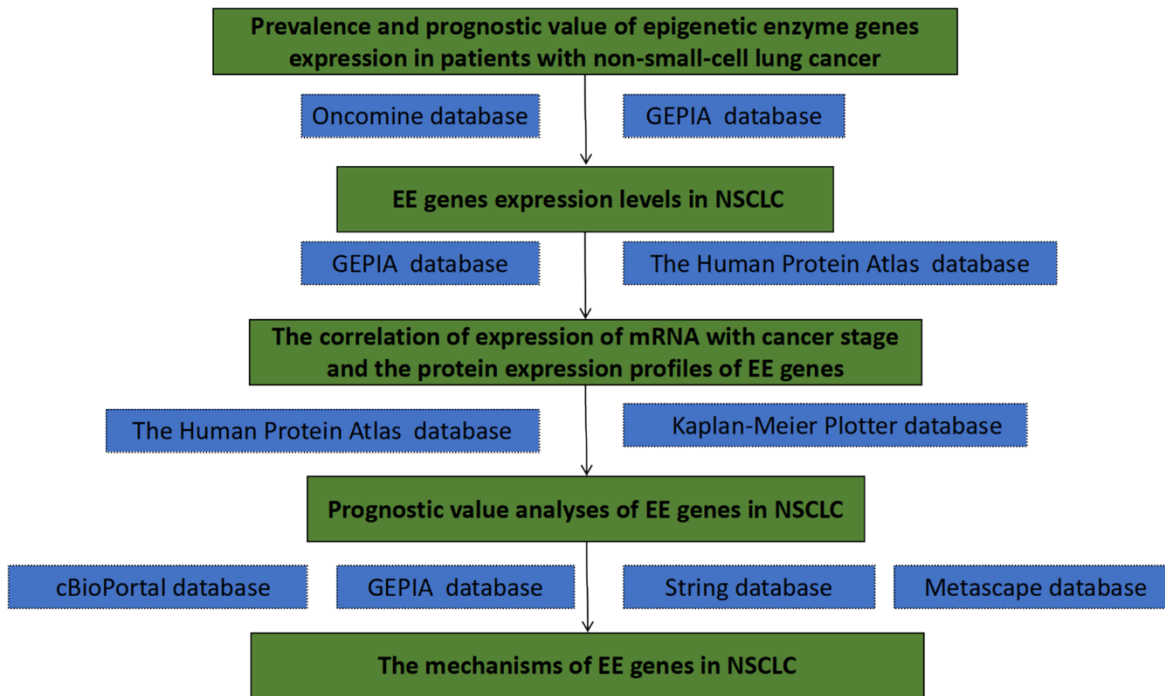

Supplementary Figure 1. The flow diagram of study strategy.
